# Supplementary material
Source: PubMed Central journal article supplement (PMC7543283)

# Lung

PC\_1

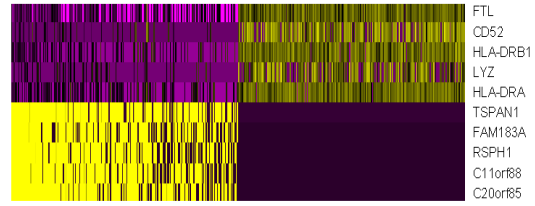

PC\_2

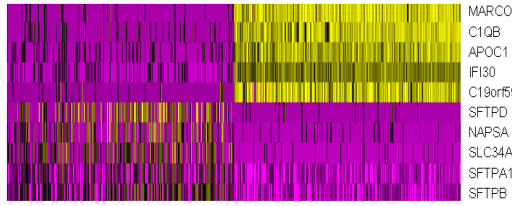

PC\_3

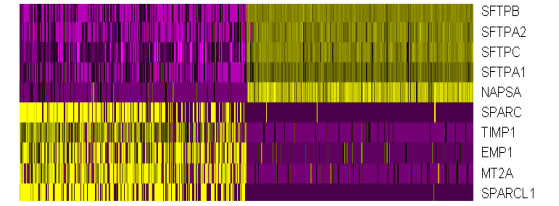

PC\_4

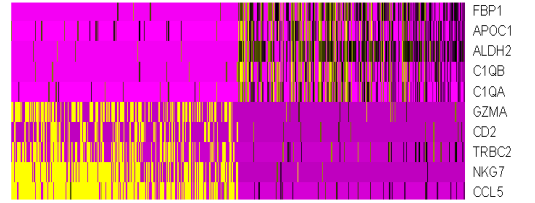

PC\_5

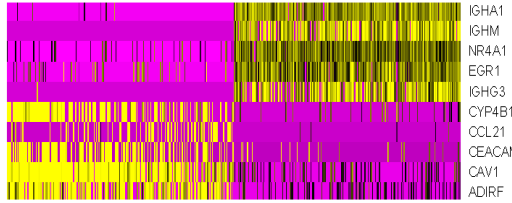

PC\_6

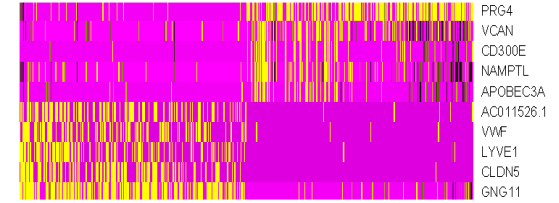

PC\_7

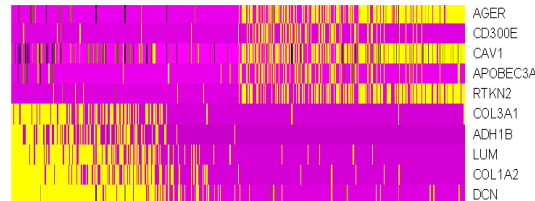

PC\_8

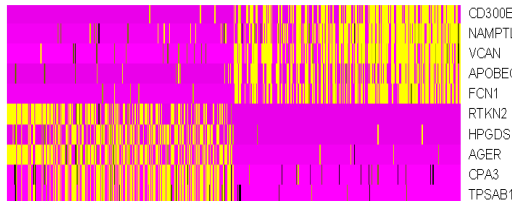

PC\_9

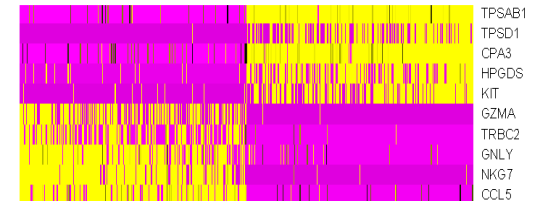

PC\_10

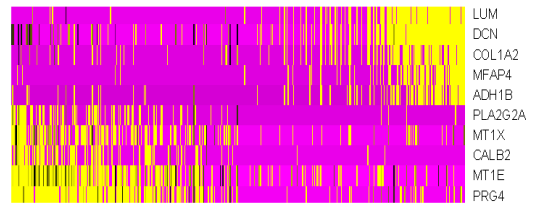

PC\_11

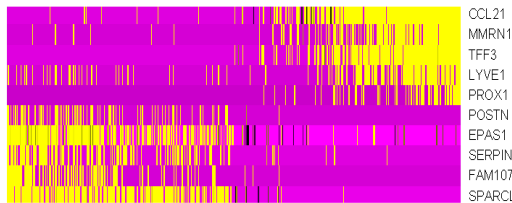

PC\_12

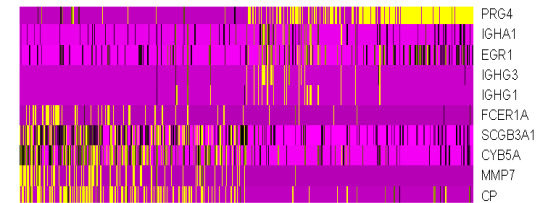

PC\_13

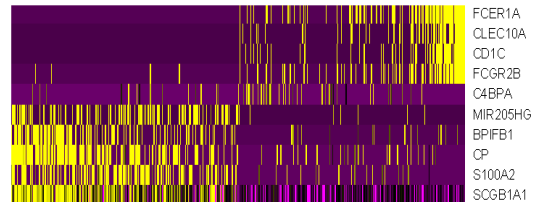

PC\_14

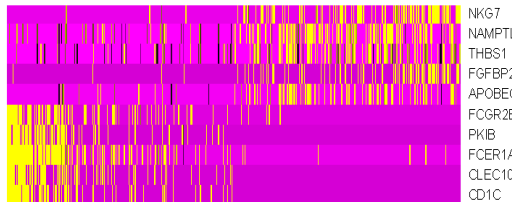

PC\_15

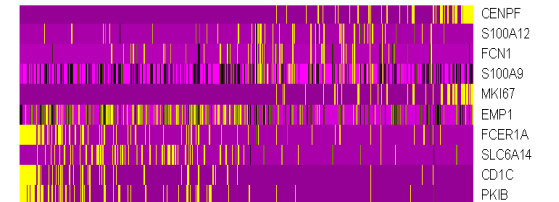

# Bladder

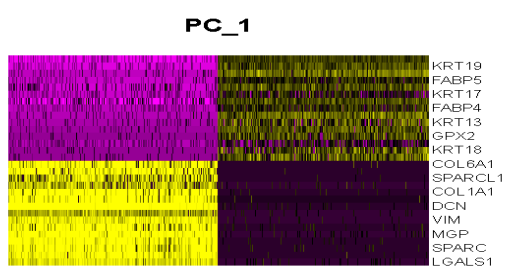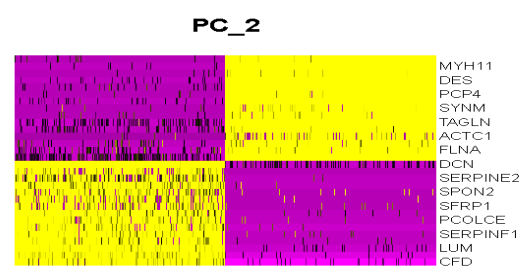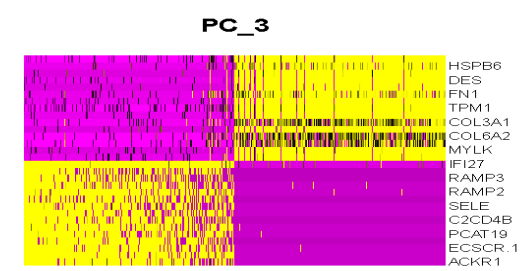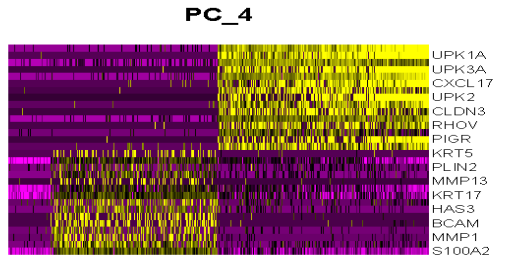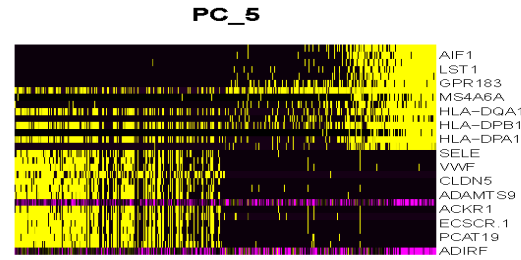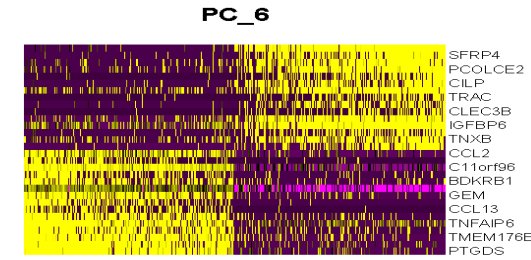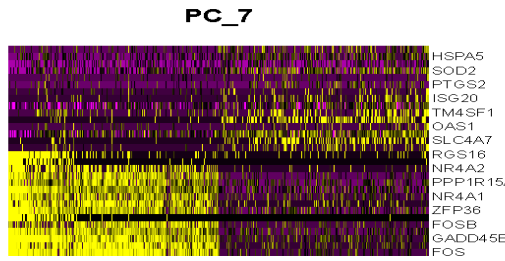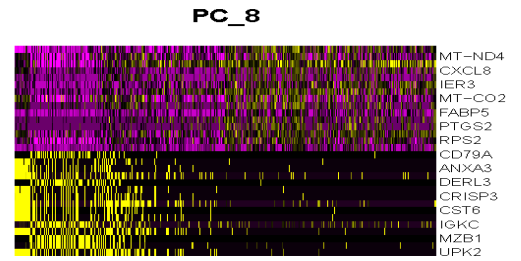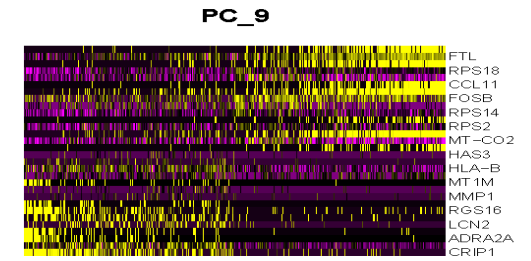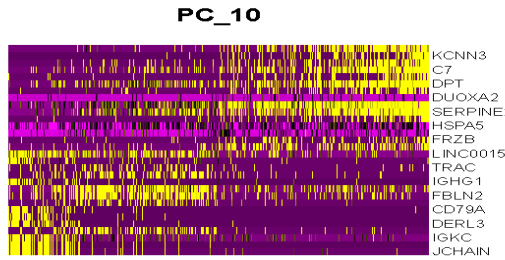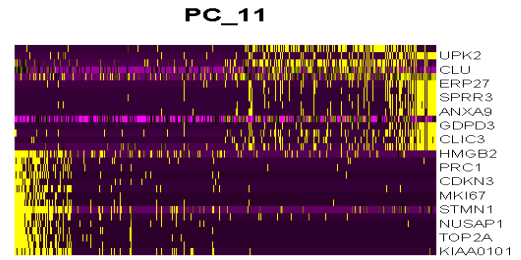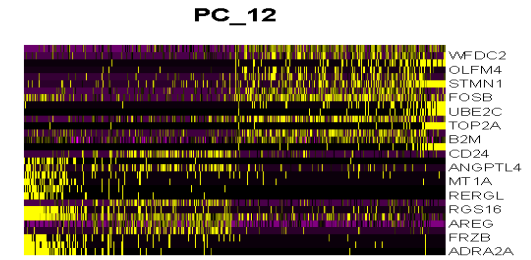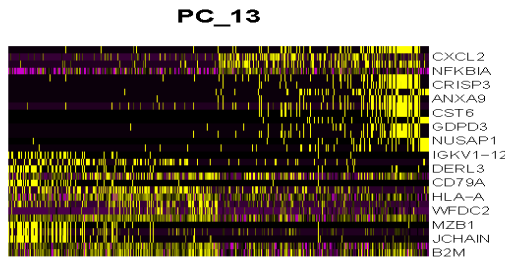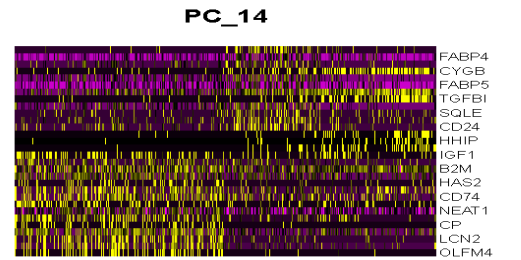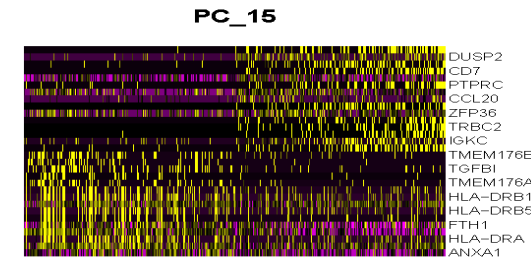

# Kidney

PC\_1

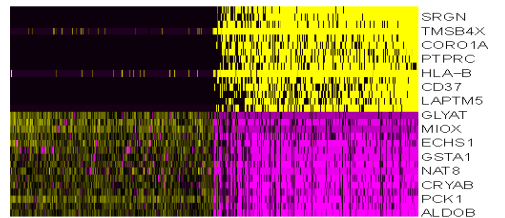

PC\_2

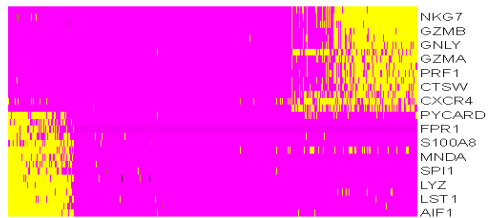

PC\_3

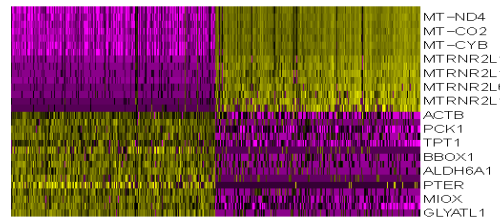

PC\_4

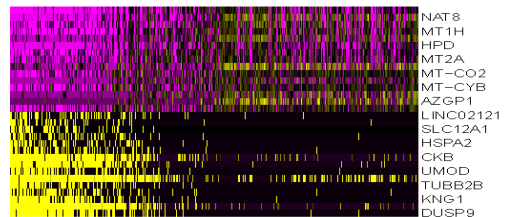

PC\_5

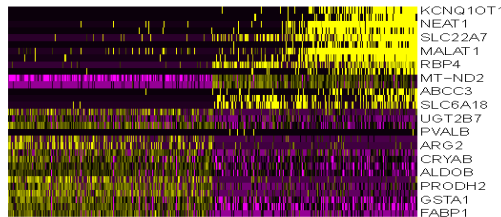

PC\_6

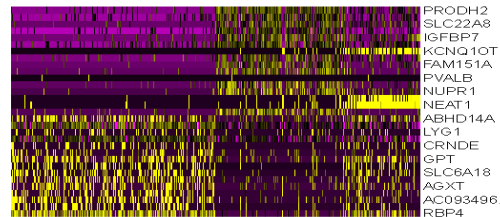

PC\_7

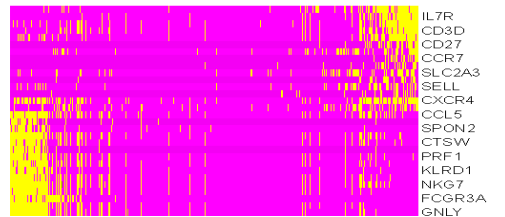

PC\_8

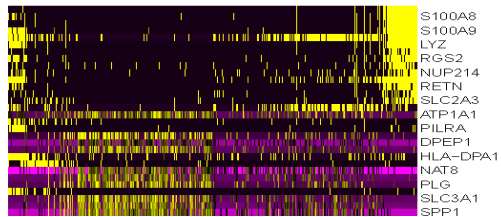

PC\_9

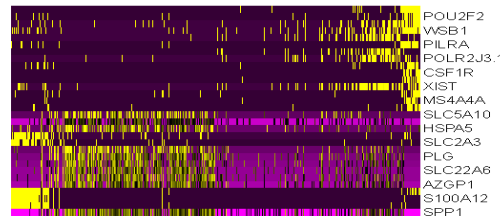

PC\_10

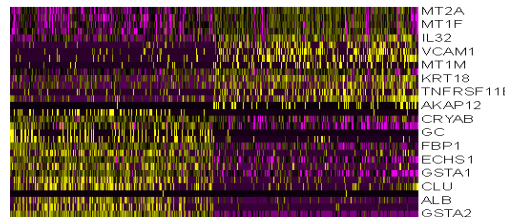

PC\_11

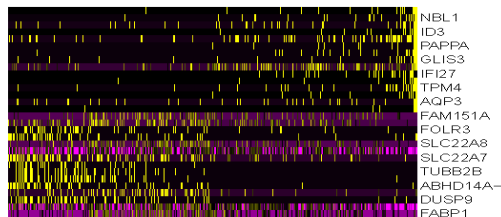

PC\_12

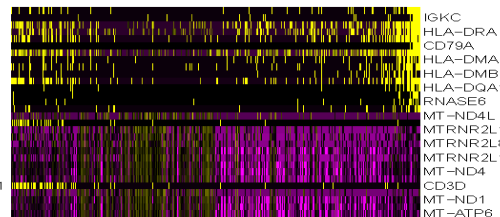

PC\_13

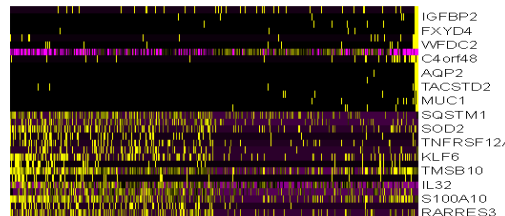

PC\_14

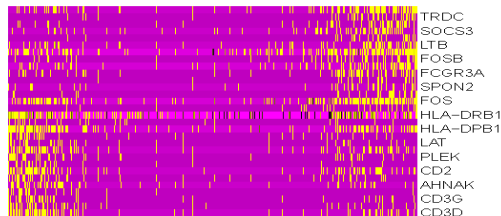

PC\_15

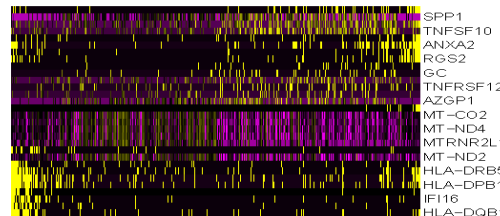

# Ileum

PC\_1

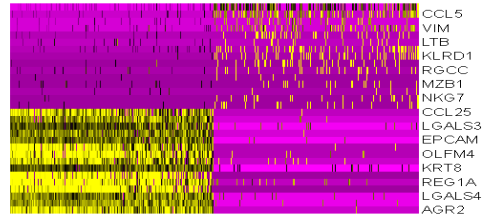

PC\_2

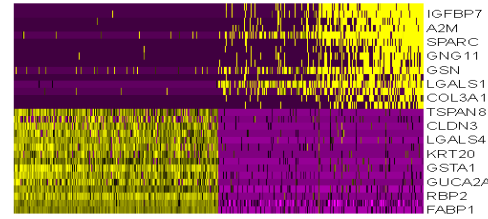

PC\_3

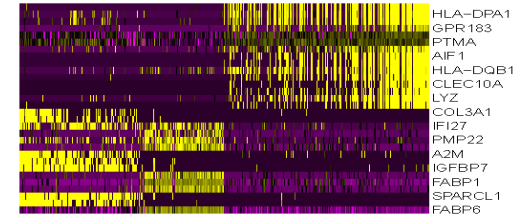

PC\_4

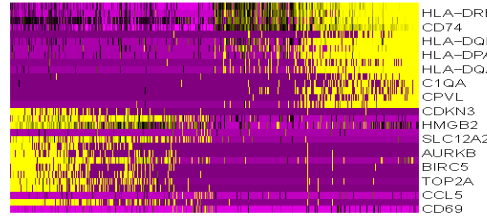

PC\_5

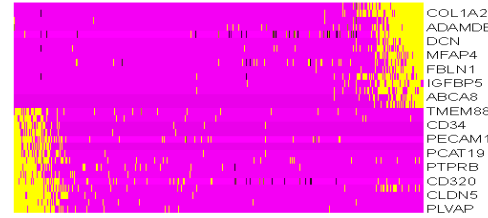

PC\_6

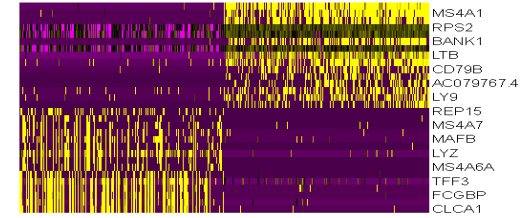

PC\_7

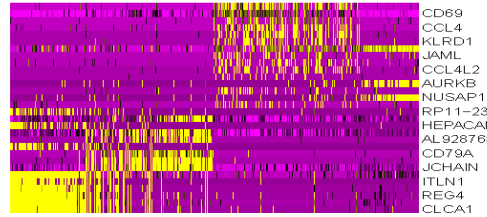

PC\_8

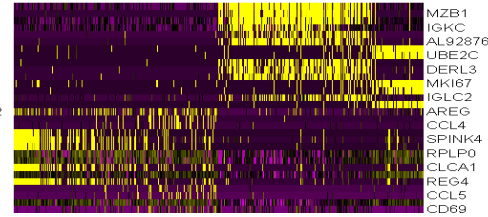

PC\_9

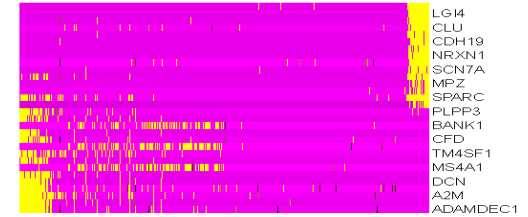

PC\_10

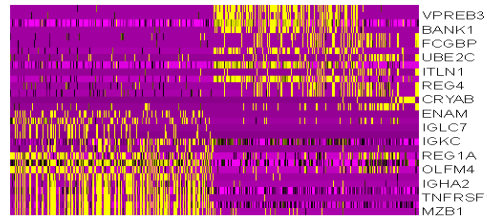

PC\_11

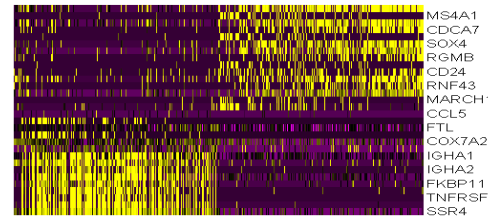

PC\_12

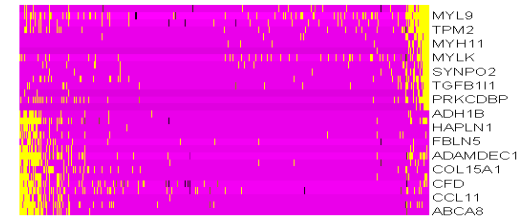

PC\_13

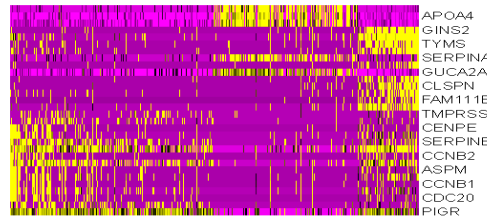

PC\_14

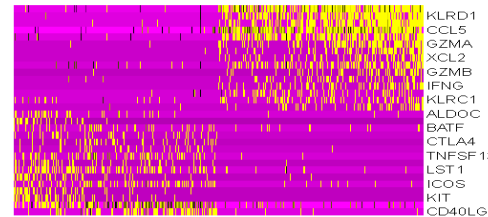

PC\_15

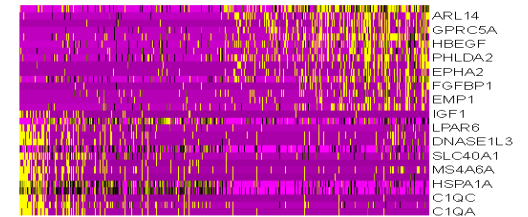

# Liver

PC\_1

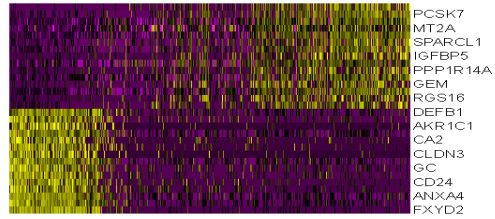

PC\_2

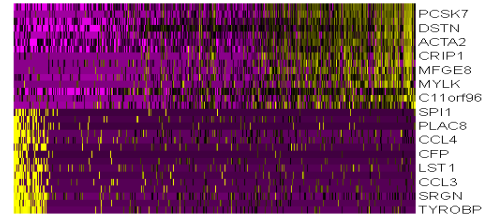

PC\_3

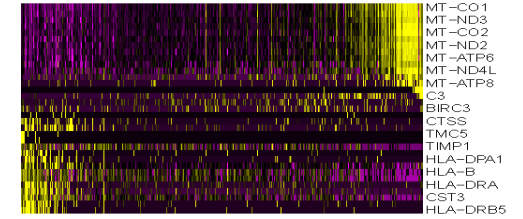

PC\_4

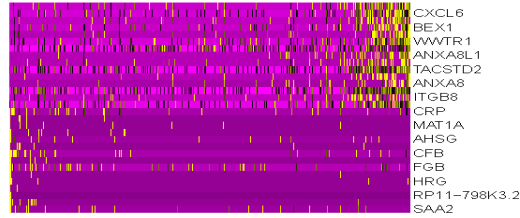

PC\_5

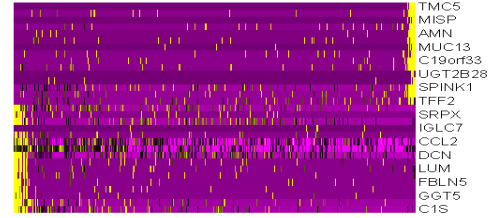

PC\_6

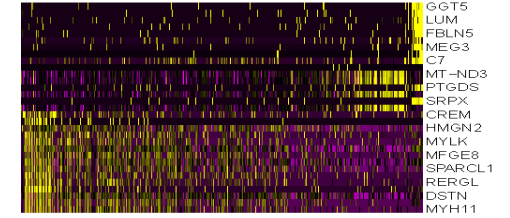

PC\_7

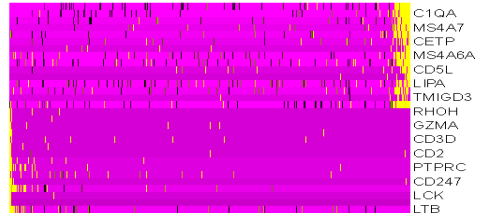

PC\_8

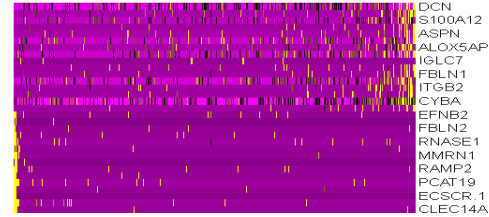

PC\_9

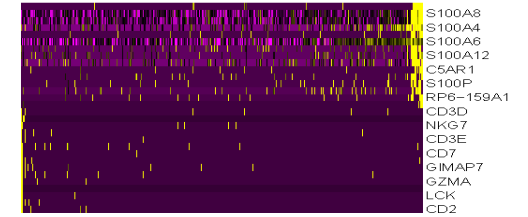

PC\_10

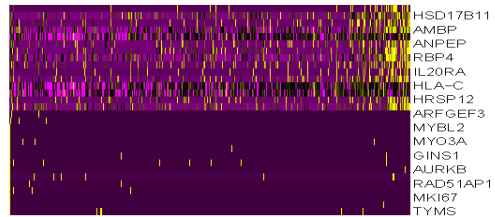

PC\_11

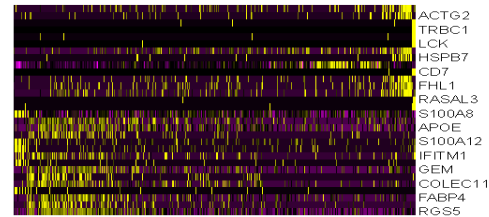

PC\_12

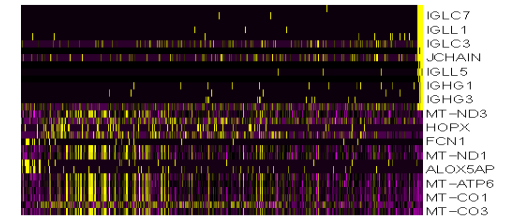

PC\_13

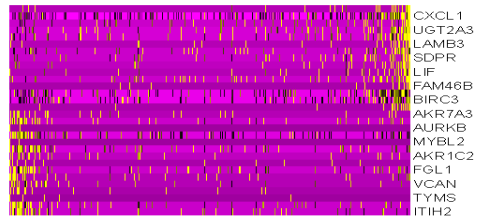

PC\_14

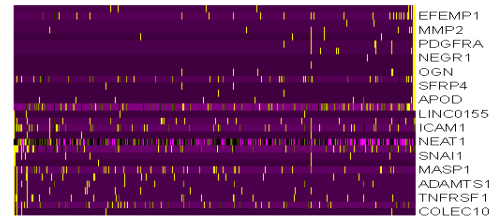

PC\_15

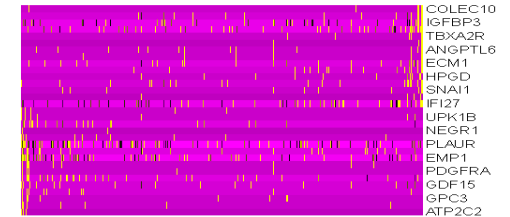

Supplement: s1_bbaa214.pdf [file s1_bbaa214.pdf]
