# Supplementary material
Source: PubMed Central journal article supplement (PMC7543283)
Supplement: s3_bbaa214.pdf [file s3_bbaa214.pdf]

| human Organ | Cell-types                       | Potential genes from PPIN                                             |
|-------------|----------------------------------|-----------------------------------------------------------------------|
| Bladder     | Urethelial cell                  | FAM3B, STINK1, TMPRSS2, ACE2, AGT, PPARG, FABP4, FABP5, AQP3, SLC14A1 |
| Ileum       | Enterocyte                       | DPEP1,ACE2,AGT,PPARA,AEPEP,FABP1,PCK1,ALDOB,TPT1                      |
| Kidney      | Proximal tubule cells            | ACE2, AGT, SLC3A1, CLU, RBP4, FABP1, PPARA                            |
|             | Principal cells                  | ACE2, NPC2, APOE, APOC3, CLU, ALB, IGFBP7                             |
|             | Smooth muscle cells              | ACE2, AGT, PPARA, MLXIPL, FAM118A, HSPA1B, JUN                        |
| Liver       | Cholangiocytests                 | ACE2, AGT, CLU, SPP1                                                  |
| Lung        | Pulmonary alveolar type II cells | ACE2, AGT, PPARA, FABP5, NPC2                                         |
|             | Plasma cells                     | ACE2, AGT, PPARA, FOS, C5PR1, FPR1                                    |
|             | Mast cells                       | ACE2, AGT, CTSG, GPR65, ANXA1                                         |

The potential markers of each organ-specific cell types are reported in this table. These markers are further evaluated for pathway semantic and to understand the ranking of the pathways inside a cell.
