# Supplementary material
Source: PubMed Central journal article supplement (PMC7543283)

ACE2

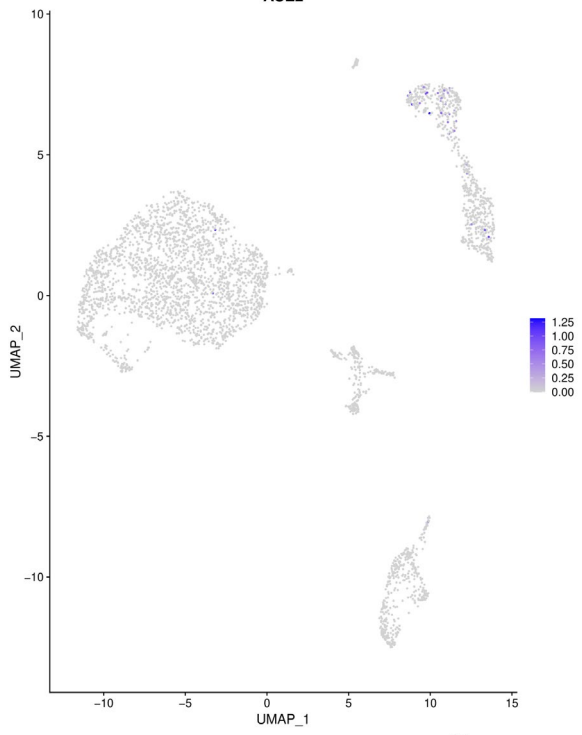

AGT

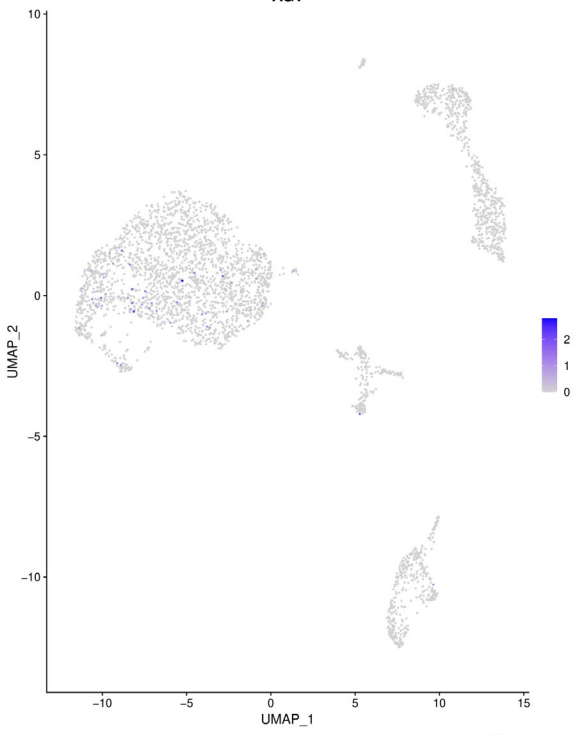

TMPRSS2

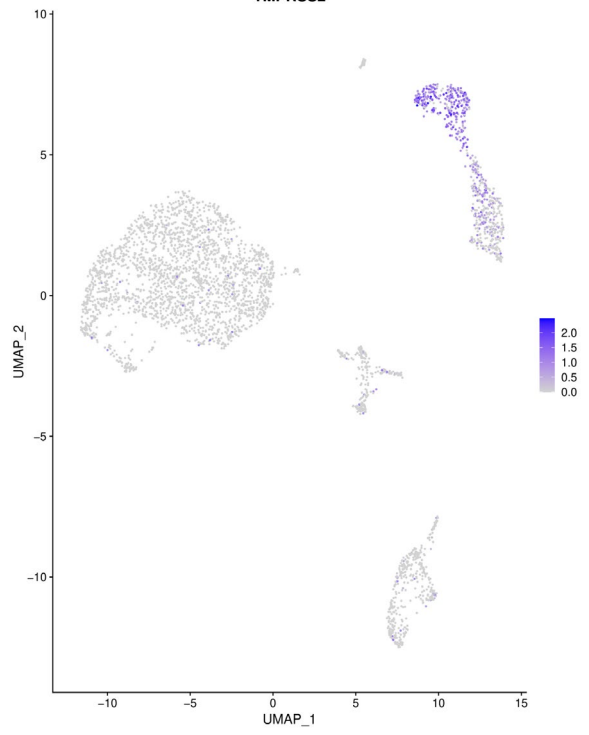

PPARA

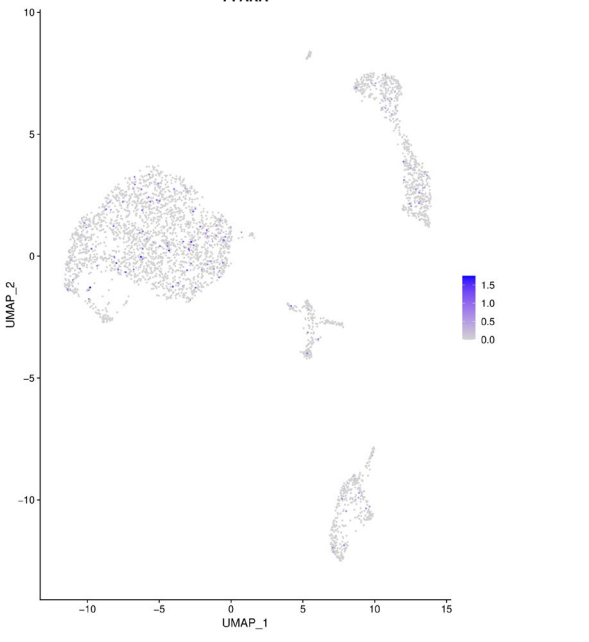

PPARG

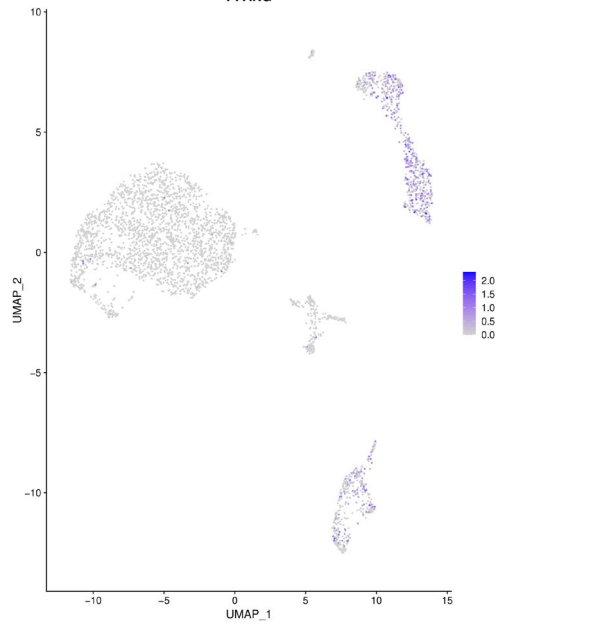

Bladder

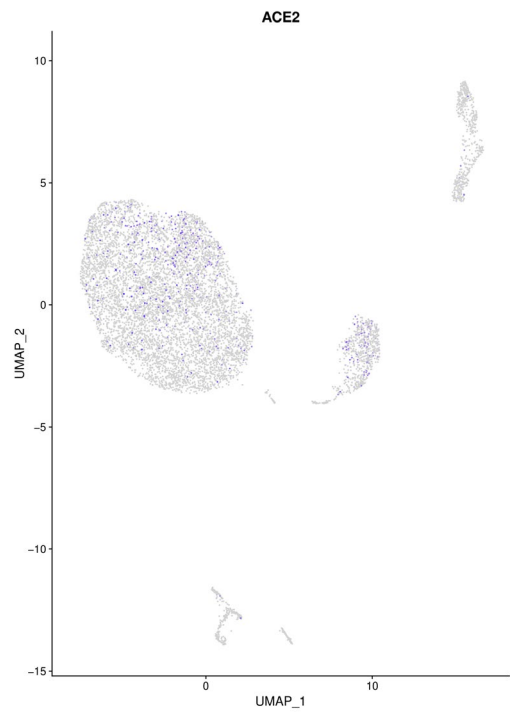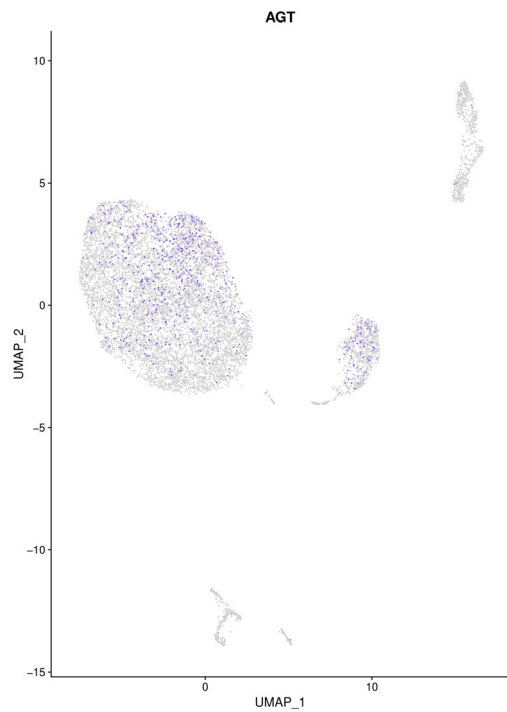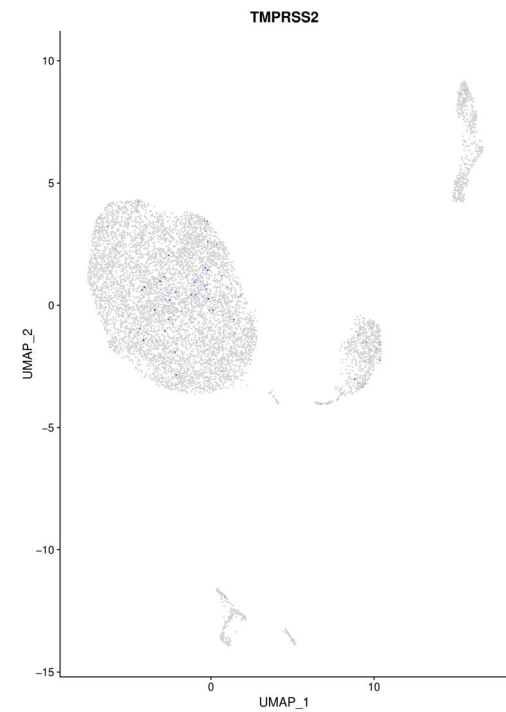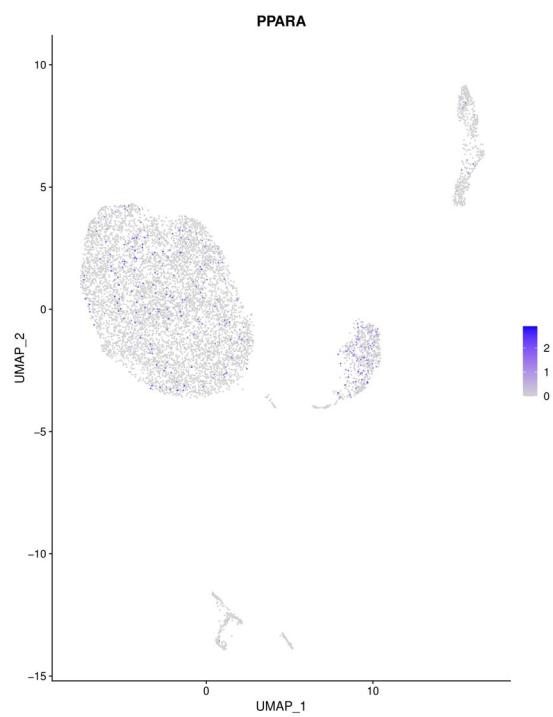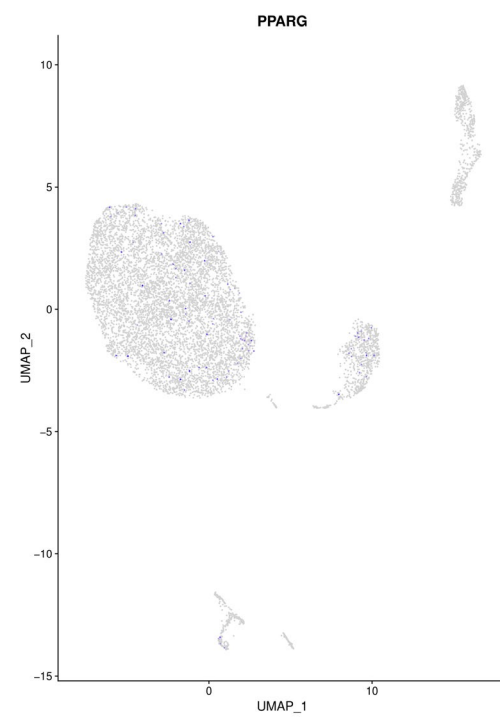

Kidney

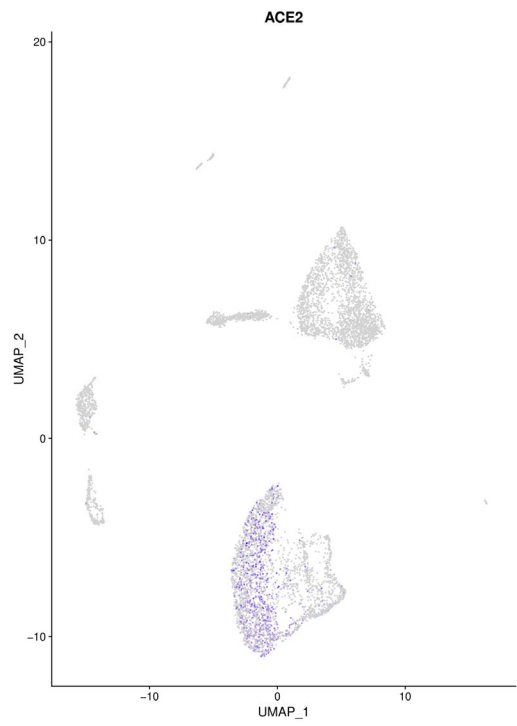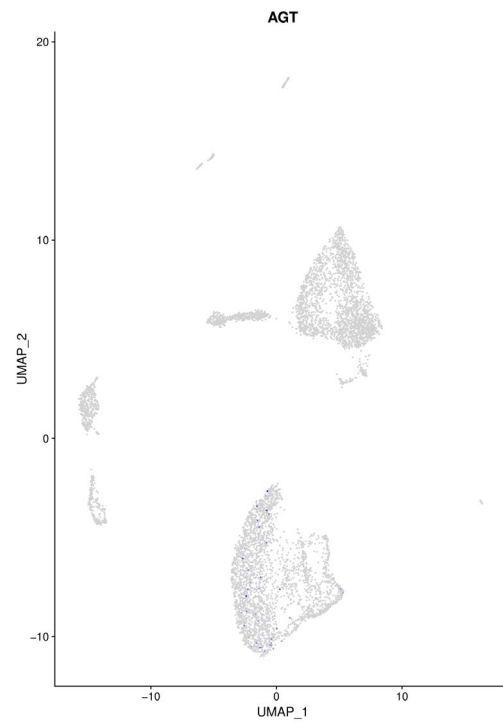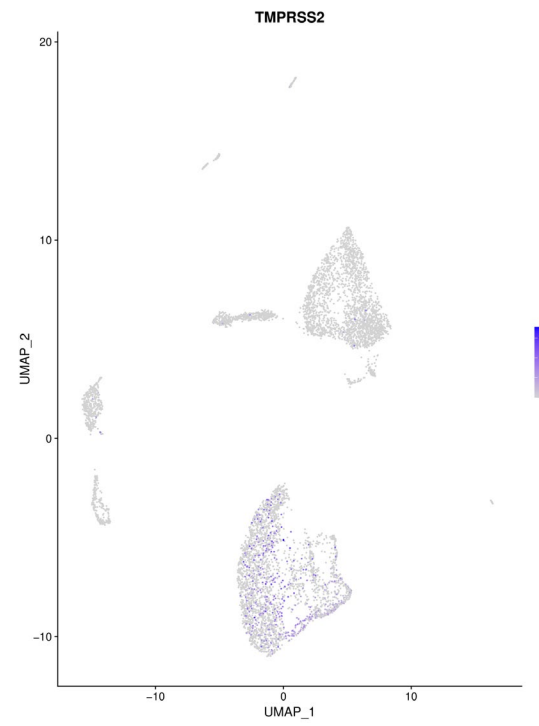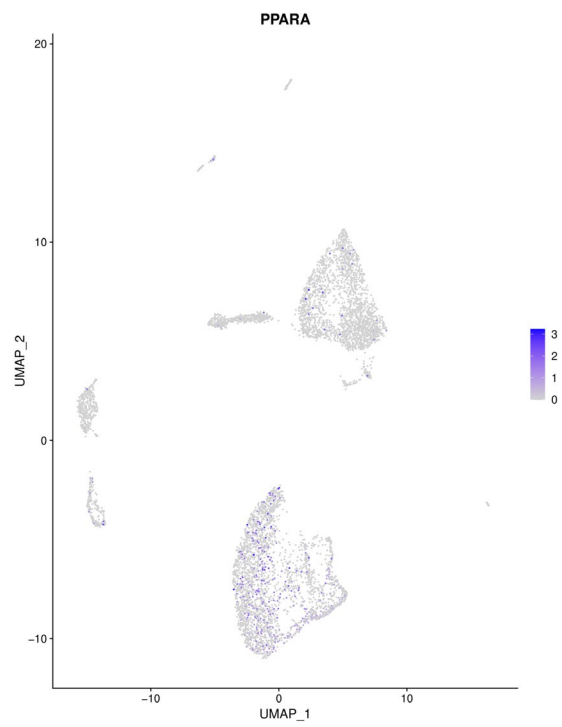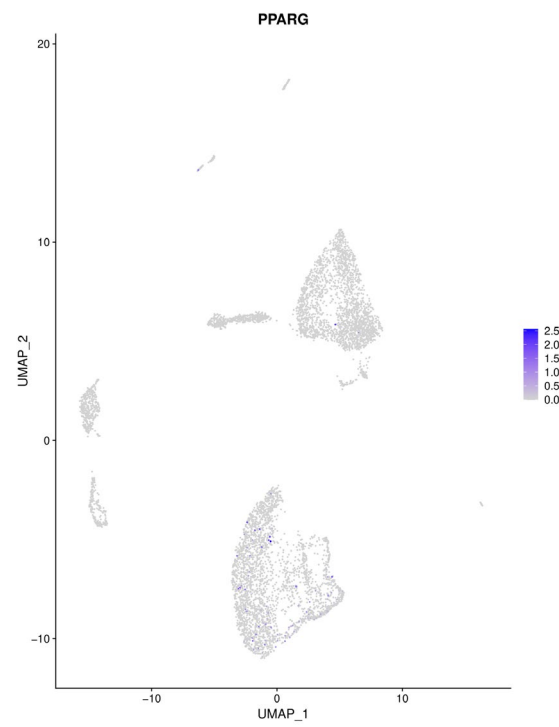

Ileum

ACE2

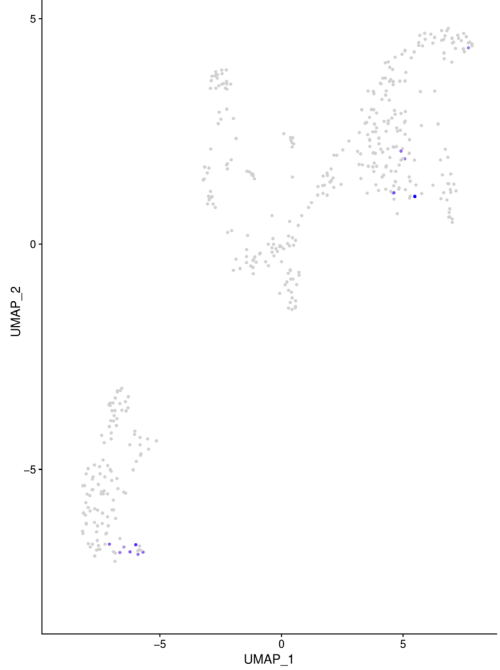

AGT

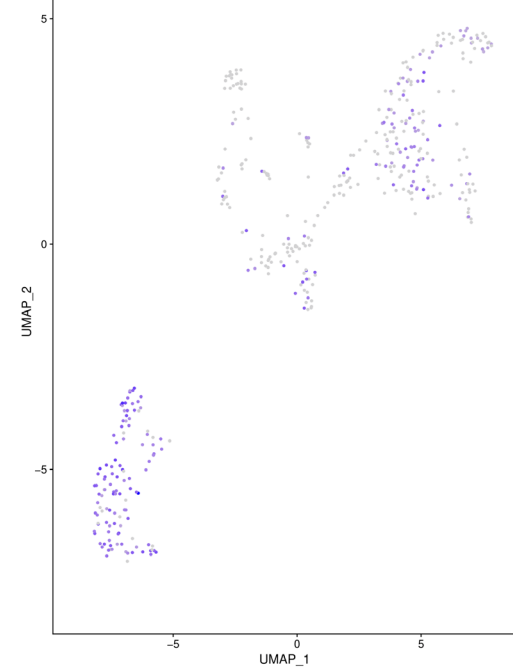

TMPRSS2

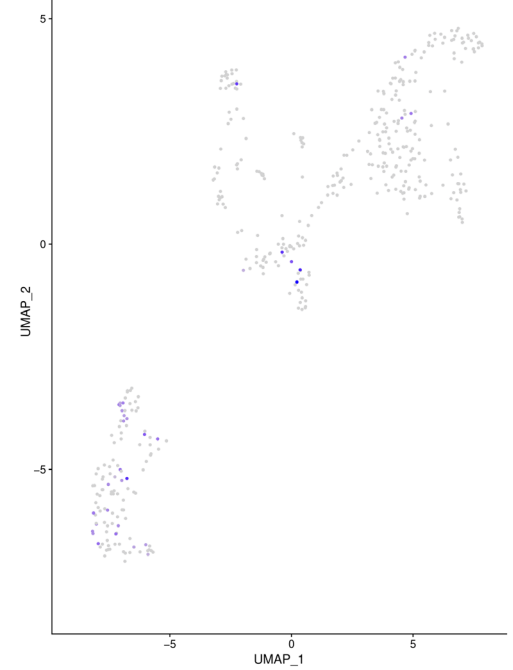

PPARA

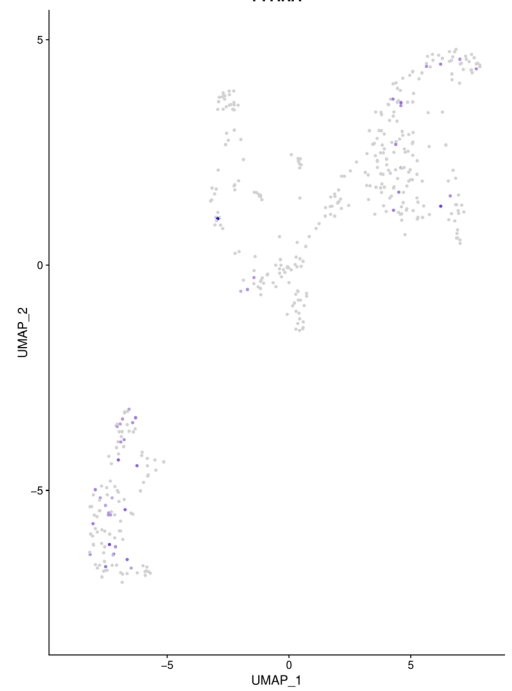

PPARG

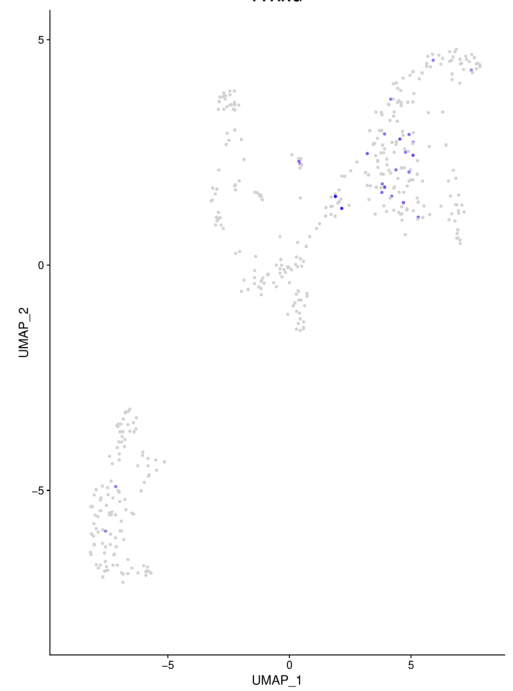

Liver

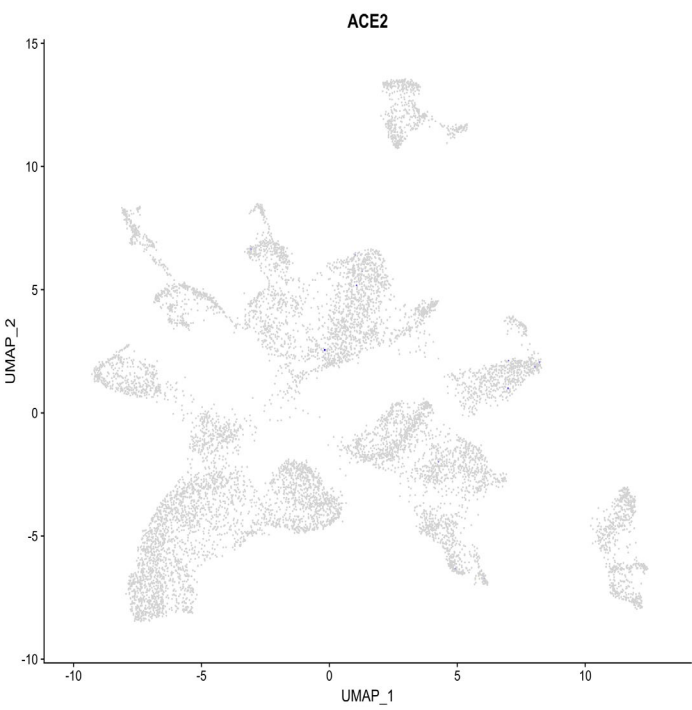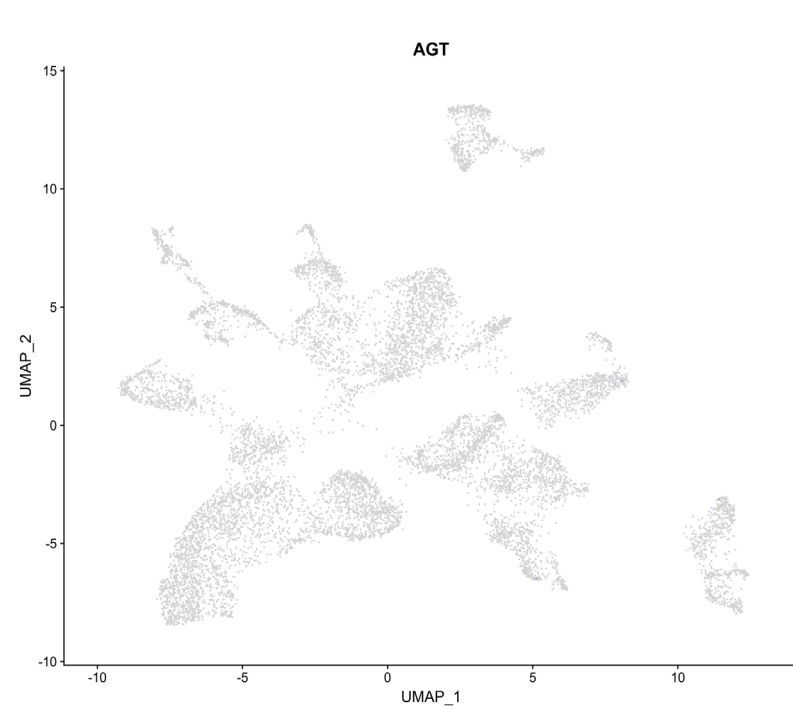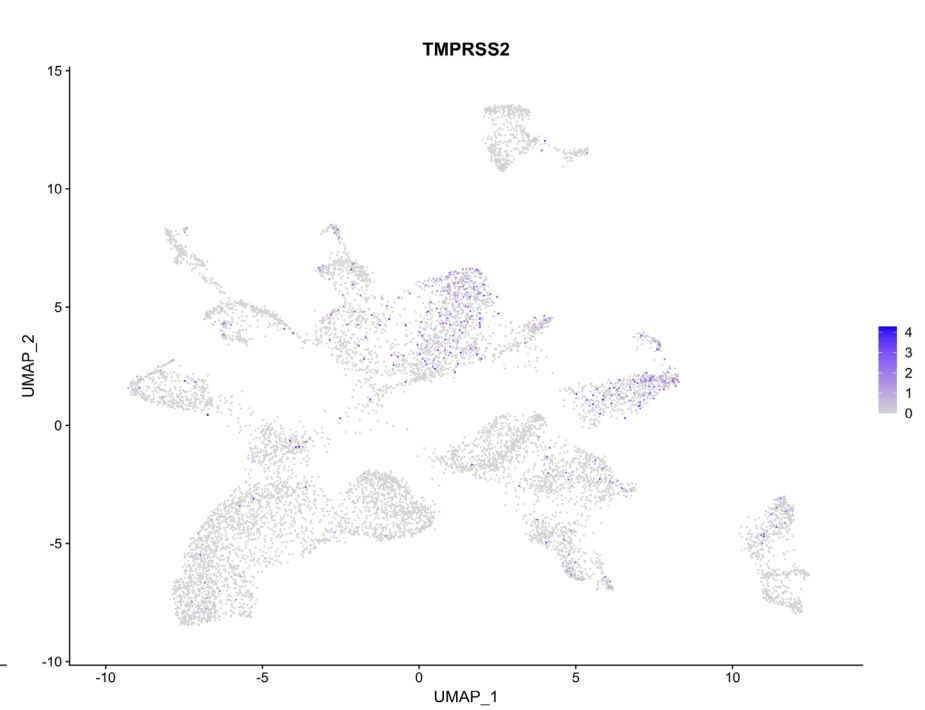

Lung

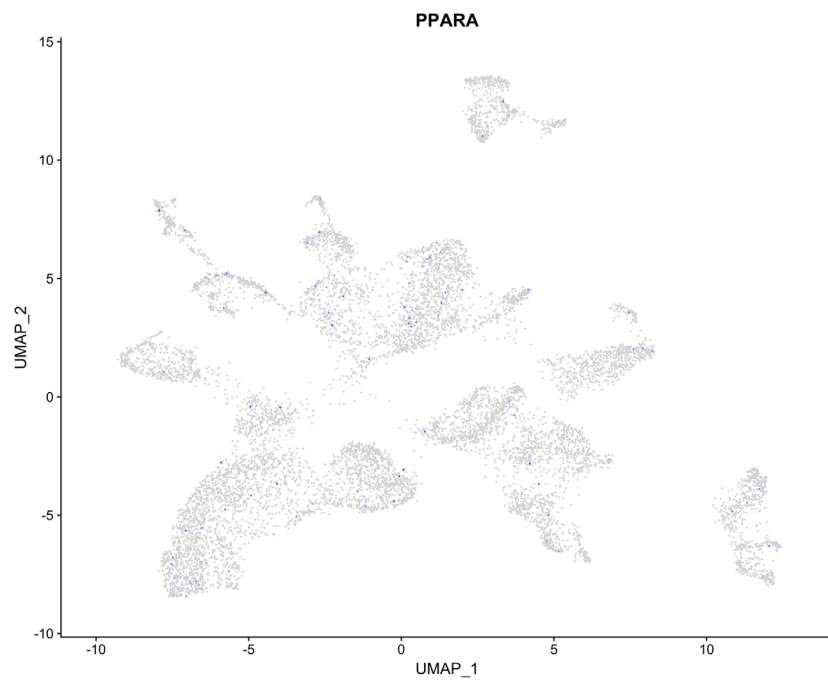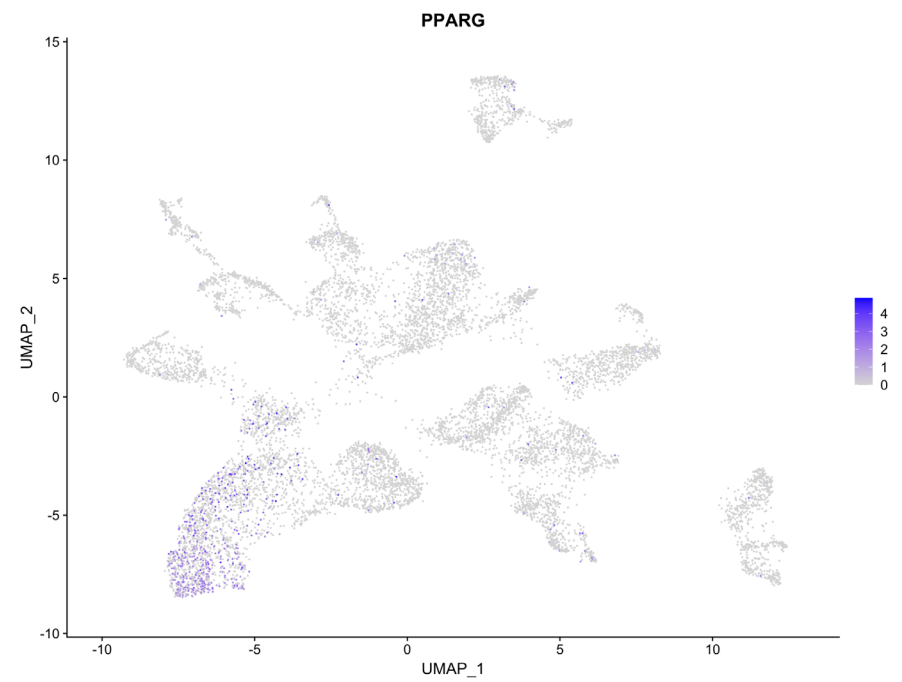

Supplement: s2_bbaa214.pdf [file s2_bbaa214.pdf]

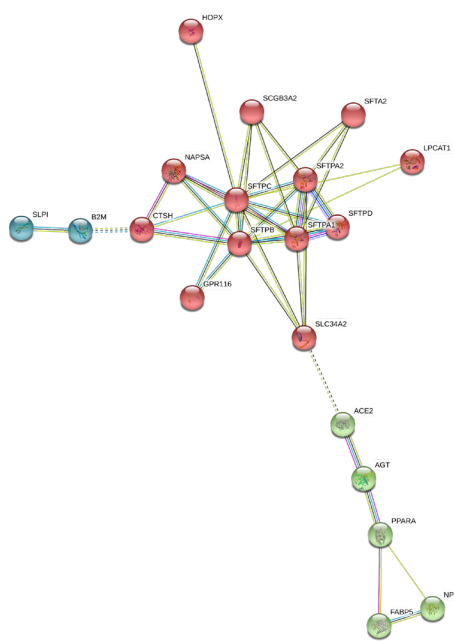

Lung

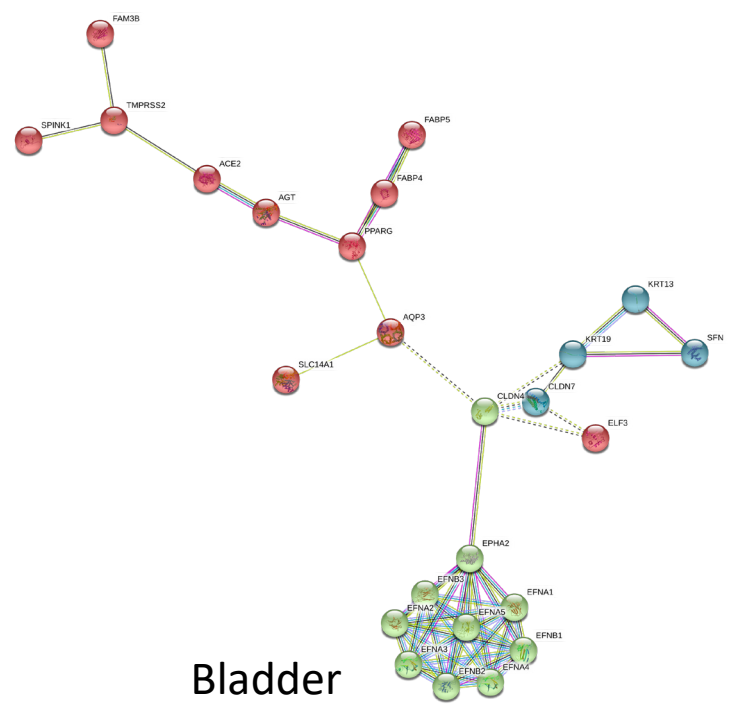

Bladder

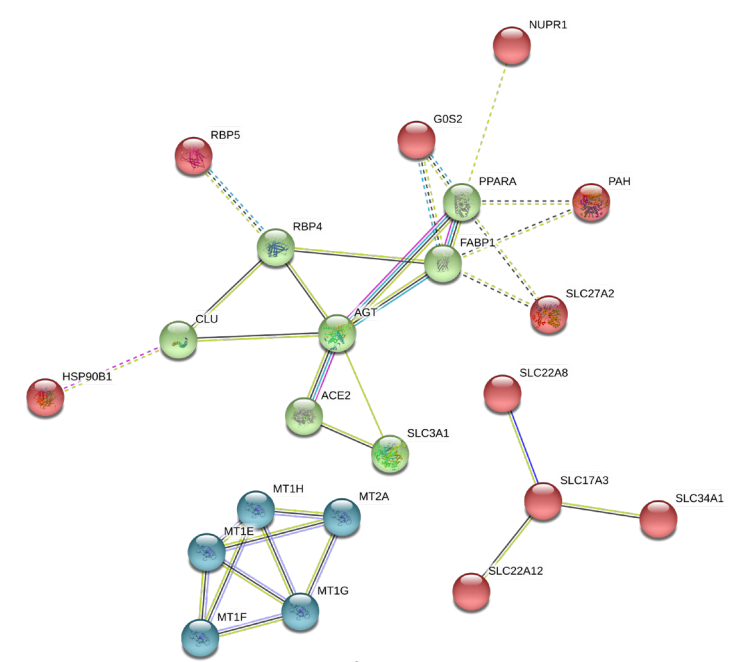

Kidney

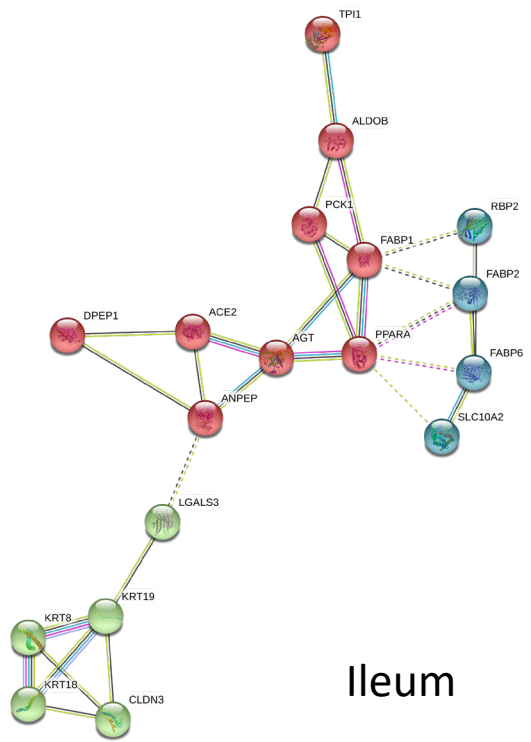

Ileum

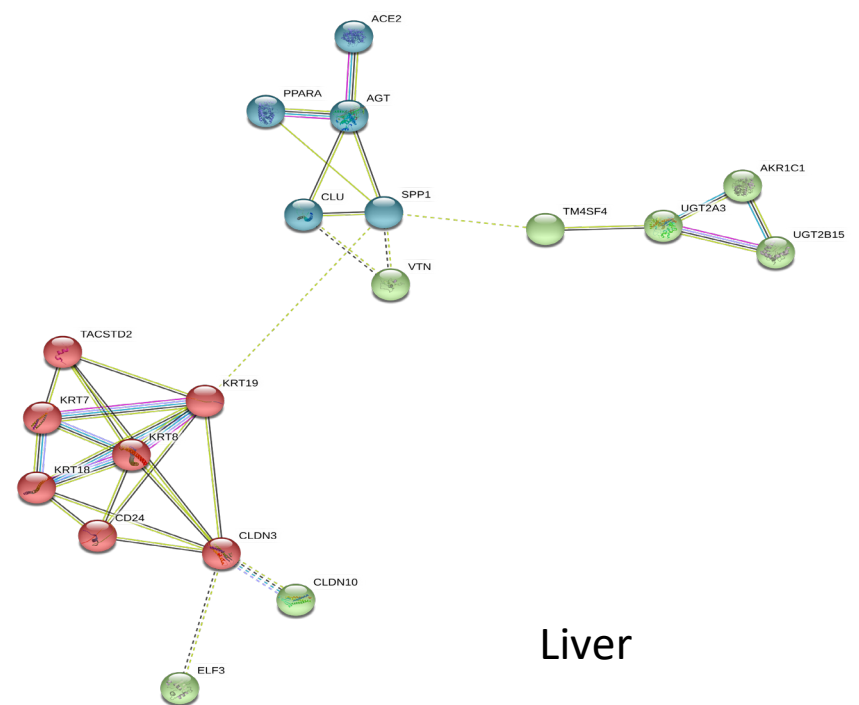

Liver

Supplement: s4_bbaa214.pdf [file s4_bbaa214.pdf]
